# Supplementary material
Source: publisher figshare collection journal article supplement (https://future-science-group.figshare.com/ndownloader/files/33851513)
Supplement: Supplementary file 1 [file 33851513]

Supplementary Material 3 Distance between cities in miles

|  | London | Bristol | Edinburgh | Newcastle |
| --- | --- | --- | --- | --- |
| London | - | 118 | 402 | 282 |
| Bristol | 118 | - | 373 | 295 |
| Edinburgh | 402 | 373 | - | 120 |
| Newcastle | 282 | 295 | 120 | - |
